# Supplementary material for: Airborne PM2.5 Chemical Components and Low Birth Weight in the Northeastern and Mid-Atlantic Regions of the United States
Source: PubMed Central journal article supplement (PMC3548298; doi:10.1289/ehp.1104763), 2012-09-20
Supplement: ehp.1104763.s001.pdf [file ehp.1104763.s001.pdf]

**Supplemental Material**

**Airborne PM<sub>2.5</sub> Chemical Components and Low Birth Weight in the Northeastern and Mid-Atlantic Regions of the United States**

**Authors:** Keita Ebisu, Michelle L. Bell

**Supplemental Material Table of Contents**

|                                       |                 |
|---------------------------------------|-----------------|
| Supplemental Material, Table S1.....  | <i>pg. S 2</i>  |
| Supplemental Material, Table S2.....  | <i>pg. S 5</i>  |
| Supplemental Material, Table S3.....  | <i>pg. S 8</i>  |
| Supplemental Material, Table S4.....  | <i>pg. S 9</i>  |
| Supplemental Material, Figure S1..... | <i>pg. S 11</i> |

Supplemental Material, Table S1. Characteristics of births not included in analysis

|                                                       | Subjects living in counties without monitors but otherwise eligible | Subjects excluded based on criteria other than availability of pollutant data (including births in counties with and without monitors) |
|-------------------------------------------------------|---------------------------------------------------------------------|----------------------------------------------------------------------------------------------------------------------------------------|
| <b>Subject Number</b>                                 | 4,868,521                                                           | 1,022,094                                                                                                                              |
| <b>Birth Weight (g) [Mean +/- Standard Deviation]</b> | 3421.0 +/- 474.8                                                    | 2567.4 +/- 810.6<br>(missing for 11,171 observations)                                                                                  |
| <b>Low Birth Weight (&lt; 2,500g)</b>                 | 120,212 (2.5%)                                                      | 423,328 (41.4%)                                                                                                                        |
| <b>Sex</b>                                            |                                                                     |                                                                                                                                        |
| Male                                                  | 2,481,112 (51.0%)                                                   | 537,989 (52.6%)                                                                                                                        |
| Female                                                | 2,387,409 (49.0%)                                                   | 484,105 (47.4%)                                                                                                                        |
| <b>Race</b>                                           |                                                                     |                                                                                                                                        |
| Caucasian                                             | 3,774,477 (77.5%)                                                   | 711,004 (69.6%)                                                                                                                        |
| African American                                      | 787,846 (16.2%)                                                     | 253,616 (24.8%)                                                                                                                        |
| Other                                                 | 306,198 (6.3%)                                                      | 57,474 (5.6%)                                                                                                                          |
| <b>Maternal Age</b>                                   |                                                                     |                                                                                                                                        |
| < 20 years                                            | 376,303 (7.7%)                                                      | 90,989 (8.9%)                                                                                                                          |
| 20 to 24                                              | 985,526 (20.2%)                                                     | 200,446 (19.6%)                                                                                                                        |
| 25 to 29                                              | 1,255,300 (25.8%)                                                   | 239,539 (23.4%)                                                                                                                        |
| 30 to 34                                              | 1,357,389 (27.9%)                                                   | 270,508 (26.5%)                                                                                                                        |
| 35 to 39                                              | 733,206 (15.1%)                                                     | 171,923 (16.8%)                                                                                                                        |
| ≥ 40                                                  | 160,797 (3.3%)                                                      | 48,689 (4.8%)                                                                                                                          |
| <b>Maternal Marital Status</b>                        |                                                                     |                                                                                                                                        |
| Married                                               | 3,312,950 (68.1%)                                                   | 616,691 (60.3%)                                                                                                                        |
| Single                                                | 1,555,571 (32.0%)                                                   | 405,403 (39.7%)                                                                                                                        |
| <b>Maternal Education</b>                             |                                                                     |                                                                                                                                        |
| Less than high school                                 | 713,789 (14.7%)                                                     | 177,959 (17.4%)                                                                                                                        |
| High school                                           | 1,383,804 (28.4%)                                                   | 300,892 (29.4%)                                                                                                                        |
| Some college                                          | 1,064,182 (21.9%)                                                   | 218,191 (21.4%)                                                                                                                        |
| College                                               | 1,653,608 (34.0%)                                                   | 307,419 (30.1%)                                                                                                                        |
| Unknown                                               | 53,138 (1.1%)                                                       | 17,633 (1.7%)                                                                                                                          |
| <b>Maternal Alcohol Consumption During Pregnancy</b>  |                                                                     |                                                                                                                                        |
| Yes                                                   | 33,528 (0.7%)                                                       | 7,635 (0.8%)                                                                                                                           |
| No                                                    | 3,695,037 (75.9%)                                                   | 727,308 (71.2%)                                                                                                                        |
| Unknown                                               | 1,139,956 (23.4%)                                                   | 287,151 (28.1%)                                                                                                                        |
| <b>Maternal Tobacco Consumption During Pregnancy</b>  |                                                                     |                                                                                                                                        |
| Yes                                                   | 488,132 (10.0%)                                                     | 119,121 (11.7%)                                                                                                                        |
| No                                                    | 4,361,384 (89.6%)                                                   | 895,083 (87.6%)                                                                                                                        |
| Unknown                                               | 19,005 (0.4%)                                                       | 7,890 (0.8%)                                                                                                                           |

Supplemental Material, Table S1 (Continued).

|                                    | Subjects living in<br>counties without<br>monitors but<br>otherwise eligible | Subjects excluded based on criteria other<br>than availability of pollutant data<br>(including births in counties with and<br>without monitors) |
|------------------------------------|------------------------------------------------------------------------------|-------------------------------------------------------------------------------------------------------------------------------------------------|
| <b>Length of Gestation</b>         |                                                                              |                                                                                                                                                 |
| Less than 37 weeks                 | -                                                                            | 690,835 (67.6%)                                                                                                                                 |
| 37 to 38                           | 1,380,171 (28.4%)                                                            | 83,812 (8.2%)                                                                                                                                   |
| 39 to 40                           | 2,571,607 (52.8%)                                                            | 27,388 (2.7%)                                                                                                                                   |
| 41 to 42                           | 785,231 (16.1%)                                                              | 6,270 (0.6%)                                                                                                                                    |
| 43 to 44                           | 131,512 (2.7%)                                                               | 1,745 (0.2%)                                                                                                                                    |
| More than 44                       | -                                                                            | 66,840 (6.5%)                                                                                                                                   |
| Missing                            | -                                                                            | 145,204 (14.2%)                                                                                                                                 |
| <b>Month Prenatal Care Begin</b>   |                                                                              |                                                                                                                                                 |
| First 3 months of pregnancy        | 3,925,708 (80.6%)                                                            | 766,431 (75.0%)                                                                                                                                 |
| 4th to 6th months of pregnancy     | 622,946 (12.8%)                                                              | 150,417 (14.7%)                                                                                                                                 |
| 7th month of pregnancy or later    | 142,858 (2.9%)                                                               | 29,333 (2.9%)                                                                                                                                   |
| No care                            | 34,360 (0.7%)                                                                | 23,706 (2.3%)                                                                                                                                   |
| Unknown                            | 142,649 (2.9%)                                                               | 52,207 (5.1%)                                                                                                                                   |
| <b>Birth Order</b>                 |                                                                              |                                                                                                                                                 |
| First baby                         | 1,590,853 (32.7%)                                                            | 293,270 (28.7%)                                                                                                                                 |
| Not first baby                     | 3,247,781 (66.7%)                                                            | 716,739 (70.1%)                                                                                                                                 |
| Unknown                            | 29,887 (0.6%)                                                                | 12,085 (1.2%)                                                                                                                                   |
| <b>Region</b>                      |                                                                              |                                                                                                                                                 |
| Connecticut                        | 262,445 (5.4%)                                                               | 42,150 (4.1%)                                                                                                                                   |
| Delaware                           | 36,740 (0.8%)                                                                | 14,238 (1.4%)                                                                                                                                   |
| Massachusetts                      | 496,394 (10.2%)                                                              | 86,444 (8.5%)                                                                                                                                   |
| Maryland and DC                    | 448,176 (9.2%)                                                               | 105,320 (10.3%)                                                                                                                                 |
| New Hampshire                      | 74,873 (1.5%)                                                                | 14,444 (1.4%)                                                                                                                                   |
| New Jersey                         | 638,518 (13.1%)                                                              | 138,247 (13.5%)                                                                                                                                 |
| Manhattan area, New York           | 920,307 (18.9%)                                                              | 212,027 (20.7%)                                                                                                                                 |
| New York other than Manhattan area | 384,049 (7.9%)                                                               | 74,267 (7.3%)                                                                                                                                   |
| Eastern PA                         | 408,817 (8.4%)                                                               | 107,474 (10.5%)                                                                                                                                 |
| Western PA                         | 286,569 (5.9%)                                                               | 61,874 (6.1%)                                                                                                                                   |
| Rhode Island                       | 55,937 (1.2%)                                                                | 14,500 (1.4%)                                                                                                                                   |
| Virginia                           | 684,951 (14.1%)                                                              | 118,587 (11.6%)                                                                                                                                 |
| Vermont                            | 37,144 (0.8%)                                                                | 5,963 (0.6%)                                                                                                                                    |
| West Virginia                      | 133,601 (2.7%)                                                               | 26,559 (2.6%)                                                                                                                                   |
| <b>Birth Year</b>                  |                                                                              |                                                                                                                                                 |
| 2000                               | 757,935 (15.6%)                                                              | 124,996 (12.2%)                                                                                                                                 |
| 2001                               | 722,177 (14.8%)                                                              | 123,682 (12.1%)                                                                                                                                 |
| 2002                               | 629,606 (12.9%)                                                              | 124,120 (12.1%)                                                                                                                                 |
| 2003                               | 561,124 (11.5%)                                                              | 126,839 (12.4%)                                                                                                                                 |

Supplemental Material, Table S1 (Continued).

|                     | <b>Subjects living in counties without monitors but otherwise eligible</b> | <b>Subjects excluded based on criteria other than availability of pollutant data (including births in counties with and without monitors)</b> |
|---------------------|----------------------------------------------------------------------------|-----------------------------------------------------------------------------------------------------------------------------------------------|
| 2004                | 574,729 (11.8%)                                                            | 128,407 (12.6%)                                                                                                                               |
| 2005                | 535,474 (11.0%)                                                            | 128,551 (12.6%)                                                                                                                               |
| 2006                | 541,745 (11.1%)                                                            | 132,485 (13.0%)                                                                                                                               |
| 2007                | 545,728 (11.2%)                                                            | 133,014 (13.0%)                                                                                                                               |
| <b>Birth Season</b> |                                                                            |                                                                                                                                               |
| Winter              | 1,155,503 (23.7%)                                                          | 249,816 (24.4%)                                                                                                                               |
| Spring              | 1,232,265 (25.3%)                                                          | 256,810 (25.1%)                                                                                                                               |
| Summer              | 1,203,625 (24.7%)                                                          | 248,630 (24.3%)                                                                                                                               |
| Fall                | 1,277,128 (26.2%)                                                          | 266,838 (26.1%)                                                                                                                               |

Supplemental Material, Table S2. Summary statistics of gestational pollutant exposures by each region

|                                                            | All             | Connecticut     | Delaware        | Massachusetts   | Maryland and DC | New Hampshire   |
|------------------------------------------------------------|-----------------|-----------------|-----------------|-----------------|-----------------|-----------------|
| Number of Infants                                          | 1,207,800       | 33,246          | 40,412          | 51,674          | 111,187         | 26,314          |
| Number of Counties                                         | 49              | 2               | 2               | 2               | 5               | 2               |
| PM <sub>10</sub> Total Mass (µg/m <sup>3</sup> )           | 22.3 (4.3)      | 25.6 (5.9)      | 23.1 (2.0)      | 21.3 (2.3)      | 19.7 (5.7)      | 17.3 (2.0)      |
| PM <sub>2.5</sub> Total Mass (µg/m <sup>3</sup> )          | 13.4 (2.1)      | 12.6 (1.2)      | 13.9 (1.5)      | 12.1 (1.2)      | 14.1 (1.4)      | 9.3 (0.8)       |
| PM <sub>2.5</sub> Chemical Components (µg/m <sup>3</sup> ) |                 |                 |                 |                 |                 |                 |
| Aluminum                                                   | 0.019 (0.01)    | 0.017 (0.006)   | 0.022 (0.014)   | 0.015 (0.008)   | 0.022 (0.009)   | 0.013 (0.005)   |
| Ammonium Ion                                               | 1.8 (0.4)       | 1.5 (0.2)       | 2.1 (0.3)       | 1.2 (0.1)       | 1.8 (0.3)       | 0.9 (0.1)       |
| Arsenic                                                    | 0.0012 (0.0006) | 0.0009 (0.0002) | 0.0013 (0.0003) | 0.0008 (0.0002) | 0.0009 (0.0002) | 0.0009 (0.0002) |
| Cadmium                                                    | 0.0016 (0.0009) | 0.0020 (0.0010) | 0.0023 (0.0012) | 0.0015 (0.0008) | 0.0012 (0.0007) | 0.0010 (0.0002) |
| Calcium                                                    | 0.046 (0.023)   | 0.030 (0.003)   | 0.058 (0.039)   | 0.032 (0.014)   | 0.039 (0.008)   | 0.032 (0.010)   |
| Chlorine                                                   | 0.037 (0.031)   | 0.021 (0.012)   | 0.039 (0.026)   | 0.050 (0.036)   | 0.018 (0.014)   | 0.048 (0.023)   |
| Elemental Carbon                                           | 0.801 (0.324)   | 0.866 (0.1324)  | 0.661 (0.165)   | 0.654 (0.165)   | 0.712 (0.144)   | 0.491 (0.094)   |
| Lead                                                       | 0.0049 (0.0027) | 0.0029 (0.0009) | 0.0038 (0.0011) | 0.0026 (0.0007) | 0.0037 (0.0011) | 0.0030 (0.0005) |
| Mercury                                                    | 0.0011 (0.0006) | 0.0011 (0.0004) | 0.0013 (0.0006) | 0.0008 (0.0004) | 0.0010 (0.0006) | 0.0006 (0.0002) |
| Nickel                                                     | 0.0061 (0.0064) | 0.0052 (0.0017) | 0.0035 (0.0012) | 0.0030 (0.0007) | 0.0012 (0.0008) | 0.0019 (0.0005) |
| Nitrate                                                    | 1.8 (0.7)       | 1.4 (0.2)       | 2.2 (0.5)       | 1.1 (0.2)       | 1.5 (0.5)       | 0.7 (0.2)       |
| Organic Carbon Matter                                      | 3.6 (1.0)       | 3.3 (0.4)       | 3.6 (1.1)       | 3.5 (0.9)       | 3.5 (1.0)       | 3.5 (0.9)       |
| Silicon                                                    | 0.075 (0.030)   | 0.053 (0.010)   | 0.102 (0.051)   | 0.057 (0.028)   | 0.086 (0.028)   | 0.058 (0.015)   |
| Sodium Ion                                                 | 0.154 (0.095)   | 0.133 (0.028)   | 0.160 (0.088)   | 0.163 (0.086)   | 0.117 (0.083)   | 0.161 (0.087)   |
| Sulfate                                                    | 4.1 (0.90)      | 3.6 (0.6)       | 4.6 (0.7)       | 3.0 (0.3)       | 4.7 (0.8)       | 2.7 (0.3)       |
| Titanium                                                   | 0.0042 (0.0018) | 0.0030 (0.0012) | 0.0058 (0.0029) | 0.0035 (0.0018) | 0.0053 (0.0023) | 0.0029 (0.0007) |
| Vanadium                                                   | 0.0043 (0.0026) | 0.0088 (0.0040) | 0.006 (0.0022)  | 0.0036 (0.001)  | 0.0025 (0.0006) | 0.0041 (0.0012) |
| Zinc                                                       | 0.019 (0.010)   | 0.011 (0.002)   | 0.015 (0.009)   | 0.015 (0.010)   | 0.014 (0.004)   | 0.014 (0.004)   |
| CO (ppm)                                                   | 0.529 (0.194)   | 0.567 (0.131)   | 0.429 (0.070)   | 0.393 (0.112)   | 0.711 (0.323)   | 0.523 (0.102)   |
| NO <sub>2</sub> (ppm)                                      | 0.021 (0.007)   | 0.021 (0.002)   | 0.019 (0.002)   | 0.019 (0.003)   | 0.019 (0.004)   | 0.010 (0.002)   |
| O <sub>3</sub> (ppm)                                       | 0.023 (0.005)   | N.A.            | 0.025 (0.004)   | 0.023 (0.004)   | 0.024 (0.004)   | 0.032 (0.000)   |
| SO <sub>2</sub> (ppb)                                      | 6.1 (2.5)       | 4.0 (0.8)       | 4.7 (1.2)       | 4.2 (1.4)       | 5.4 (1.6)       | 4.0 (1.3)       |

Supplemental Material, Table S2 (continued).

|                                                            | New Jersey      | Manhattan, New York | New York Other than Manhattan | Eastern Pennsylvania | Western Pennsylvania |
|------------------------------------------------------------|-----------------|---------------------|-------------------------------|----------------------|----------------------|
| Number of Infants                                          | 146,508         | 344,901             | 82,194                        | 203,428              | 100,355              |
| Number of Counties                                         | 4               | 3                   | 4                             | 10                   | 6                    |
| PM <sub>10</sub> Total Mass (µg/m <sup>3</sup> )           | 27.5 (3.6)      | 21.5 (2.8)          | 7.7 (1.3)                     | 23.6 (4.1)           | 22.6 (4.0)           |
| PM <sub>2.5</sub> Total Mass (µg/m <sup>3</sup> )          | 12.7 (1.9)      | 13.8 (1.5)          | 11.5 (1.9)                    | 14.8 (1.8)           | 14.7 (1.9)           |
| PM <sub>2.5</sub> Chemical Components (µg/m <sup>3</sup> ) |                 |                     |                               |                      |                      |
| Aluminum                                                   | 0.022 (0.015)   | 0.017 (0.006)       | 0.013 (0.006)                 | 0.019 (0.008)        | 0.023 (0.010)        |
| Ammonium Ion                                               | 1.7 (0.3)       | 1.9 (0.2)           | 1.7 (0.3)                     | 2.2 (0.4)            | 1.9 (0.4)            |
| Arsenic                                                    | 0.0010 (0.0002) | 0.0009 (0.0002)     | 0.0012 (0.0005)               | 0.0014 (0.0004)      | 0.0022 (0.0008)      |
| Cadmium                                                    | 0.0020 (0.0008) | 0.0013 (0.0005)     | 0.0009 (0.0003)               | 0.0020 (0.0009)      | 0.0021 (0.0009)      |
| Calcium                                                    | 0.035 (0.017)   | 0.064 (0.021)       | 0.051 (0.033)                 | 0.040 (0.011)        | 0.037 (0.010)        |
| Chlorine                                                   | 0.025 (0.018)   | 0.048 (0.029)       | 0.031 (0.021)                 | 0.037 (0.032)        | 0.047 (0.051)        |
| Elemental Carbon                                           | 0.864 (0.520)   | 1.013 (0.272)       | 0.483 (0.160)                 | 0.731 (0.146)        | 0.854 (0.350)        |
| Lead                                                       | 0.0043 (0.0015) | 0.0047 (0.0013)     | 0.0065 (0.0038)               | 0.0051 (0.0016)      | 0.0088 (0.0040)      |
| Mercury                                                    | 0.0013 (0.0006) | 0.0009 (0.0004)     | 0.0008 (0.0004)               | 0.0014 (0.0007)      | 0.0015 (0.0008)      |
| Nickel                                                     | 0.0037 (0.0014) | 0.0148 (0.0055)     | 0.0005 (0.0002)               | 0.0032 (0.0017)      | 0.0017 (0.0011)      |
| Nitrate                                                    | 1.7 (0.5)       | 2.1 (0.4)           | 1.8 (0.6)                     | 2.5 (0.9)            | 1.4 (0.4)            |
| Organic Carbon Matter                                      | 3.5 (1.3)       | 3.8 (0.8)           | 2.9 (0.7)                     | 3.8 (0.9)            | 3.4 (0.8)            |
| Silicon                                                    | 0.071 (0.034)   | 0.074 (0.017)       | 0.064 (0.024)                 | 0.078 (0.041)        | 0.085 (0.027)        |
| Sodium Ion                                                 | 0.149 (0.094)   | 0.200 (0.112)       | 0.172 (0.077)                 | 0.128 (0.073)        | 0.092 (0.036)        |
| Sulfate                                                    | 4.0 (0.7)       | 4.1 (0.5)           | 3.6 (0.7)                     | 4.5 (0.8)            | 5.0 (1.0)            |
| Titanium                                                   | 0.0043 (0.0019) | 0.0046 (0.0013)     | 0.0032 (0.0013)               | 0.0037 (0.0015)      | 0.0040 (0.0014)      |
| Vanadium                                                   | 0.0043 (0.0024) | 0.0066 (0.0011)     | 0.0013 (0.0005)               | 0.0036 (0.0018)      | 0.0013 (0.0005)      |
| Zinc                                                       | 0.014 (0.007)   | 0.029 (0.006)       | 0.014 (0.006)                 | 0.016 (0.005)        | 0.024 (0.011)        |
| CO (ppm)                                                   | 0.599 (0.206)   | 0.602 (0.112)       | 0.457 (0.049)                 | 0.438 (0.155)        | 0.308 (0.126)        |
| NO <sub>2</sub> (ppm)                                      | 0.020 (0.008)   | 0.028 (0.004)       | 0.016 (0.002)                 | 0.020 (0.005)        | 0.014 (0.003)        |
| O <sub>3</sub> (ppm)                                       | 0.028 (0.004)   | 0.018 (0.003)       | 0.027 (0.004)                 | 0.022 (0.003)        | 0.024 (0.003)        |
| SO <sub>2</sub> (ppb)                                      | 4.2 (1.0)       | 8.1 (2.7)           | 5.3 (1.7)                     | 5.2 (1.4)            | 7.4 (2.1)            |

Supplemental Material, Table S2 (continued).

|                                                            | Rhode Island    | Virginia        | Vermont         | West Virginia   |
|------------------------------------------------------------|-----------------|-----------------|-----------------|-----------------|
| Number of Infants                                          | 31,108          | 20,399          | 8,653           | 7,421           |
| Number of Counties                                         | 1               | 5               | 1               | 2               |
| PM <sub>10</sub> Total Mass (µg/m <sup>3</sup> )           | 19.4 (2.6)      | 26.5 (4.5)      | 15.0 (3.3)      | 22.9 (2.1)      |
| PM <sub>2.5</sub> Total Mass (µg/m <sup>3</sup> )          | 10.9 (1.0)      | 13.6 (1.3)      | 9.0 (1.0)       | 15.3 (1.8)      |
| PM <sub>2.5</sub> Chemical Components (µg/m <sup>3</sup> ) |                 |                 |                 |                 |
| Aluminum                                                   | 0.013 (0.004)   | 0.019 (0.009)   | 0.013 (0.004)   | 0.029 (0.015)   |
| Ammonium Ion                                               | 1.1 (0.1)       | 1.7 (0.2)       | 1.0 (0.1)       | 1.6 (0.2)       |
| Arsenic                                                    | 0.0013 (0.0010) | 0.0012 (0.0004) | 0.0005 (0.0001) | 0.0013 (0.0003) |
| Cadmium                                                    | 0.0008 (0.0004) | 0.0020 (0.0008) | 0.0021 (0.0008) | 0.0018 (0.0008) |
| Calcium                                                    | 0.026 (0.005)   | 0.024 (0.005)   | 0.024 (0.004)   | 0.031 (0.006)   |
| Chlorine                                                   | 0.039 (0.022)   | 0.009 (0.004)   | 0.007 (0.004)   | 0.014 (0.010)   |
| Elemental Carbon                                           | 0.542 (0.067)   | 0.536 (0.084)   | 0.321 (0.044)   | 0.587 (0.066)   |
| Lead                                                       | 0.0055 (0.0065) | 0.0035 (0.0015) | 0.0020 (0.0004) | 0.0035 (0.0013) |
| Mercury                                                    | 0.0007 (0.0004) | 0.0014 (0.0005) | 0.0012 (0.0004) | 0.0015 (0.0006) |
| Nickel                                                     | 0.0040 (0.0015) | 0.0016 (0.0006) | 0.0009 (0.0002) | 0.0012 (0.0004) |
| Nitrate                                                    | 1.1 (0.2)       | 1.1 (0.3)       | 0.8 (0.2)       | 0.7 (0.2)       |
| Organic Carbon Matter                                      | 3.1 (0.7)       | 4.7 (0.8)       | 2.7 (0.6)       | 3.0 (0.4)       |
| Silicon                                                    | 0.065 (0.020)   | 0.069 (0.020)   | 0.057 (0.014)   | 0.094 (0.023)   |
| Sodium Ion                                                 | 0.154 (0.026)   | 0.143 (0.103)   | 0.123 (0.081)   | 0.066 (0.016)   |
| Sulfate                                                    | 3.1 (0.4)       | 4.9 (0.8)       | 2.2 (0.4)       | 5.2 (0.9)       |
| Titanium                                                   | 0.0031 (0.0008) | 0.0034 (0.0014) | 0.0024 (0.0009) | 0.0032 (0.0008) |
| Vanadium                                                   | 0.0063 (0.0023) | 0.0016 (0.0006) | 0.0011 (0.0002) | 0.0014 (0.0009) |
| Zinc                                                       | 0.010 (0.002)   | 0.011 (0.009)   | 0.006 (0.001)   | 0.010 (0.001)   |
| CO (ppm)                                                   | 0.553 (0.093)   | 0.403 (0.048)   | 0.490 (0.110)   | N.A.            |
| NO <sub>2</sub> (ppm)                                      | 0.017 (0.003)   | 0.019 (0.002)   | 0.013 (0.002)   | N.A.            |
| O <sub>3</sub> (ppm)                                       | N.A.            | 0.031 (0.002)   | 0.034 (0.002)   | 0.028 (0.002)   |
| SO <sub>2</sub> (ppb)                                      | 5.0 (1.3)       | 3.9 (0.5)       | 2.5 (0.1)       | 9.7 (0.8)       |

Supplemental Material, Table S3. Minimum and maximum of Pearson correlations for any region.

Note: The minimum correlation for any region is provided in the top row. The maximum correlation for any region is provided in the bottom row.

|                              | PM <sub>2.5</sub> | Al            | NH <sub>4</sub> <sup>+</sup> | As            | Cd            | Ca            | Cl            | EC            | Pb            | Hg            | Ni            | NO <sub>3</sub> <sup>-</sup> | OCM           | Si            | Na <sup>+</sup> | SO <sub>4</sub> <sup>=</sup> | Ti            | V             | Zn            | CO            | NO <sub>2</sub> | O <sub>3</sub> | SO <sub>2</sub> |
|------------------------------|-------------------|---------------|------------------------------|---------------|---------------|---------------|---------------|---------------|---------------|---------------|---------------|------------------------------|---------------|---------------|-----------------|------------------------------|---------------|---------------|---------------|---------------|-----------------|----------------|-----------------|
| PM <sub>10</sub>             | -0.10<br>0.99     | -0.61<br>0.40 | -0.19<br>0.86                | -0.64<br>0.80 | -0.54<br>0.67 | -0.58<br>0.78 | -0.60<br>0.68 | -0.30<br>0.89 | -0.56<br>0.81 | -0.35<br>0.68 | -0.70<br>0.62 | -0.68<br>0.54                | -0.77<br>0.87 | -0.28<br>0.67 | -0.67<br>0.23   | 0.08<br>0.96                 | -0.59<br>0.80 | -0.59<br>0.66 | -0.67<br>0.79 | -0.53<br>0.87 | -0.67<br>0.88   | 0.12<br>0.77   | -0.61<br>0.63   |
| PM <sub>2.5</sub>            |                   | -0.36<br>0.54 | 0.34<br>0.92                 | -0.18<br>0.76 | -0.07<br>0.66 | -0.12<br>0.68 | -0.36<br>0.47 | -0.37<br>0.65 | -0.25<br>0.75 | -0.18<br>0.61 | -0.34<br>0.63 | -0.60<br>0.58                | 0.35<br>0.85  | 0.13<br>0.58  | -0.32<br>0.44   | 0.60<br>0.93                 | 0.19<br>0.79  | -0.13<br>0.71 | -0.58<br>0.63 | -0.43<br>0.70 | -0.48<br>0.68   | -0.73<br>0.68  | -0.50<br>0.77   |
| Al                           |                   |               | -0.21<br>0.44                | -0.57<br>0.48 | -0.77<br>0.02 | -0.19<br>0.80 | -0.40<br>0.62 | -0.43<br>0.59 | -0.54<br>0.67 | -0.74<br>0.08 | -0.41<br>0.45 | -0.49<br>0.22                | -0.31<br>0.72 | -0.24<br>0.86 | -0.49<br>0.53   | -0.23<br>0.30                | -0.66<br>0.61 | -0.49<br>0.52 | -0.41<br>0.72 | -0.84<br>0.37 | -0.56<br>0.35   | 0.01<br>0.74   | -0.64<br>0.31   |
| NH <sub>4</sub> <sup>+</sup> |                   |               |                              | -0.18<br>0.72 | -0.02<br>0.50 | -0.26<br>0.76 | -0.33<br>0.61 | -0.38<br>0.70 | -0.07<br>0.64 | -0.14<br>0.33 | -0.38<br>0.81 | -0.09<br>0.79                | -0.03<br>0.88 | -0.15<br>0.66 | -0.50<br>0.32   | 0.51<br>0.90                 | 0.03<br>0.72  | -0.35<br>0.69 | -0.27<br>0.65 | -0.47<br>0.62 | -0.70<br>0.70   | -0.72<br>0.56  | -0.42<br>0.70   |
| As                           |                   |               |                              |               | 0.08<br>0.75  | -0.32<br>0.62 | -0.28<br>0.70 | -0.78<br>0.82 | 0.13<br>0.98  | -0.09<br>0.74 | -0.47<br>0.63 | -0.08<br>0.70                | -0.40<br>0.76 | -0.65<br>0.57 | -0.28<br>0.44   | -0.01<br>0.57                | -0.22<br>0.62 | -0.21<br>0.68 | -0.08<br>0.86 | -0.64<br>0.88 | -0.40<br>0.86   | -0.93<br>0.26  | -0.09<br>0.54   |
| Cd                           |                   |               |                              |               |               | -0.26<br>0.60 | -0.65<br>0.30 | -0.72<br>0.50 | -0.13<br>0.72 | -0.16<br>0.78 | -0.61<br>0.73 | -0.15<br>0.49                | -0.25<br>0.51 | -0.48<br>0.58 | -0.36<br>0.24   | -0.04<br>0.30                | -0.12<br>0.79 | -0.24<br>0.72 | -0.35<br>0.44 | -0.41<br>0.80 | -0.23<br>0.81   | -0.80<br>0.03  | -0.09<br>0.74   |
| Ca                           |                   |               |                              |               |               |               | -0.42<br>0.77 | -0.40<br>0.85 | -0.35<br>0.69 | -0.44<br>0.49 | -0.65<br>0.74 | -0.21<br>0.59                | -0.42<br>0.80 | -0.36<br>0.96 | -0.49<br>0.71   | -0.22<br>0.69                | -0.05<br>0.94 | -0.38<br>0.80 | -0.17<br>0.77 | -0.46<br>0.57 | -0.35<br>0.74   | -0.70<br>0.66  | -0.41<br>0.64   |
| Cl                           |                   |               |                              |               |               |               |               | -0.30<br>0.78 | -0.35<br>0.72 | -0.64<br>0.23 | -0.30<br>0.71 | -0.16<br>0.75                | -0.34<br>0.60 | -0.37<br>0.67 | -0.43<br>0.40   | -0.41<br>0.27                | -0.55<br>0.52 | -0.25<br>0.64 | -0.15<br>0.87 | -0.35<br>0.68 | -0.21<br>0.71   | -0.39<br>0.76  | -0.37<br>0.80   |
| EC                           |                   |               |                              |               |               |               |               |               | -0.68<br>0.81 | -0.65<br>0.41 | -0.25<br>0.83 | -0.46<br>0.71                | -0.35<br>0.86 | -0.53<br>0.76 | -0.76<br>0.82   | -0.36<br>0.50                | -0.56<br>0.75 | -0.47<br>0.80 | -0.22<br>0.81 | -0.79<br>0.84 | -0.73<br>0.93   | -0.55<br>0.91  | -0.27<br>0.71   |
| Pb                           |                   |               |                              |               |               |               |               |               |               | -0.31<br>0.75 | -0.65<br>0.72 | -0.05<br>0.62                | -0.14<br>0.71 | -0.48<br>0.76 | -0.26<br>0.51   | 0.01<br>0.47                 | -0.09<br>0.73 | -0.20<br>0.85 | 0.02<br>0.91  | -0.59<br>0.74 | -0.25<br>0.71   | -0.52<br>0.28  | -0.34<br>0.67   |
| Hg                           |                   |               |                              |               |               |               |               |               |               |               | -0.29<br>0.54 | -0.25<br>0.45                | -0.52<br>0.27 | -0.63<br>0.43 | -0.46<br>0.23   | -0.04<br>0.37                | -0.42<br>0.41 | -0.21<br>0.55 | -0.51<br>0.30 | -0.37<br>0.65 | -0.48<br>0.61   | -0.83<br>0.65  | -0.27<br>0.57   |
| Ni                           |                   |               |                              |               |               |               |               |               |               |               |               | -0.23<br>0.80                | 0.02<br>0.69  | -0.37<br>0.49 | -0.81<br>0.55   | -0.23<br>0.62                | -0.41<br>0.67 | -0.02<br>0.99 | -0.45<br>0.61 | -0.82<br>0.80 | -0.24<br>0.87   | -0.67<br>0.98  | -0.23<br>0.65   |
| NO <sub>3</sub>              |                   |               |                              |               |               |               |               |               |               |               |               |                              | -0.17<br>0.67 | -0.60<br>0.46 | -0.39<br>0.69   | -0.46<br>0.20                | -0.16<br>0.51 | -0.24<br>0.76 | -0.10<br>0.81 | -0.31<br>0.91 | -0.21<br>0.94   | -0.78<br>0.28  | 0.09<br>0.91    |
| OCM                          |                   |               |                              |               |               |               |               |               |               |               |               |                              |               | -0.09<br>0.83 | -0.29<br>0.68   | 0.25<br>0.72                 | -0.09<br>0.83 | -0.06<br>0.71 | -0.47<br>0.69 | -0.62<br>0.60 | -0.15<br>0.84   | -0.23<br>0.52  | -0.40<br>0.66   |
| Si                           |                   |               |                              |               |               |               |               |               |               |               |               |                              |               |               | -0.32<br>0.74   | 0.00<br>0.57                 | 0.07<br>0.88  | -0.36<br>0.58 | -0.55<br>0.79 | -0.62<br>0.65 | -0.16<br>0.62   | -0.13<br>0.69  | -0.61<br>0.71   |
| Na <sup>+</sup>              |                   |               |                              |               |               |               |               |               |               |               |               |                              |               |               |                 | -0.29<br>0.30                | -0.22<br>0.76 | -0.78<br>0.56 | -0.66<br>0.64 | -0.69<br>0.88 | -0.67<br>0.72   | -0.49<br>0.21  | -0.32<br>0.85   |
| SO <sub>4</sub> <sup>=</sup> |                   |               |                              |               |               |               |               |               |               |               |               |                              |               |               |                 |                              | 0.23<br>0.67  | -0.07<br>0.61 | -0.49<br>0.41 | -0.29<br>0.31 | -0.86<br>0.47   | -0.91<br>0.73  | -0.43<br>0.44   |
| Ti                           |                   |               |                              |               |               |               |               |               |               |               |               |                              |               |               |                 |                              |               | -0.28<br>0.71 | -0.47<br>0.61 | -0.66<br>0.68 | -0.37<br>0.83   | -0.18<br>0.39  | -0.59<br>0.70   |
| V                            |                   |               |                              |               |               |               |               |               |               |               |               |                              |               |               |                 |                              |               |               | -0.30<br>0.75 | -0.84<br>0.76 | -0.58<br>0.81   | -0.86<br>0.52  | -0.30<br>0.85   |
| Zn                           |                   |               |                              |               |               |               |               |               |               |               |               |                              |               |               |                 |                              |               |               |               | -0.51<br>0.72 | -0.30<br>0.78   | -0.65<br>0.27  | -0.14<br>0.84   |
| CO                           |                   |               |                              |               |               |               |               |               |               |               |               |                              |               |               |                 |                              |               |               |               |               | -0.43<br>0.92   | -0.65<br>0.13  | -0.35<br>0.87   |
| NO <sub>2</sub>              |                   |               |                              |               |               |               |               |               |               |               |               |                              |               |               |                 |                              |               |               |               |               |                 | -0.72<br>0.29  | -0.16<br>0.89   |
| O <sub>3</sub>               |                   |               |                              |               |               |               |               |               |               |               |               |                              |               |               |                 |                              |               |               |               |               |                 |                | -0.76<br>0.66   |



Supplemental Material, Table S4. Percent change in relative risk of low birth weight from logistic regression model without pollution variables (95% confidence interval)

| Category                                             | Risk of Low Birth Weight (%) |
|------------------------------------------------------|------------------------------|
| <b>Sex</b>                                           |                              |
| Male                                                 | -35.2 (-36.6, -33.7)**       |
| Female                                               | Reference                    |
| <b>Race</b>                                          |                              |
| African American                                     | 67.0 (62.8, 71.4)**          |
| Other                                                | 79.2 (72.6, 86.0)**          |
| Caucasian                                            | Reference                    |
| <b>Maternal Age</b>                                  |                              |
| < 20 years                                           | 6.0 (1.2, 11.1)**            |
| 20 to 24                                             | 1.9 (-1.7, 5.6)              |
| 25 to 29                                             | 0.1 (-3.1, 3.4)              |
| 35 to 39                                             | 7.4 (3.3, 11.6)**            |
| ≥ 40                                                 | 38.9 (30.7, 47.5)**          |
| 30 to 34                                             | Reference                    |
| <b>Maternal Marital Status</b>                       |                              |
| Unmarried                                            | 33.4 (29.7, 37.2)**          |
| Married                                              | Reference                    |
| <b>Maternal Education</b>                            |                              |
| Less than high school                                | 9.8 (6.5, 13.2)**            |
| Some College                                         | -11.7 (-14.5, -8.9)**        |
| College                                              | -23.7 (-26.3, -21.0)**       |
| Unknown                                              | 5.6 (-4.7, 17.1)             |
| High school                                          | Reference                    |
| <b>Maternal Alcohol Consumption During Pregnancy</b> |                              |
| Yes                                                  | 39.6 (20.7, 61.5)**          |
| Unknown                                              | -3.0 (-7.3, 1.5)             |
| No                                                   | Reference                    |
| <b>Maternal Tobacco Consumption During Pregnancy</b> |                              |
| Yes                                                  | 125.4 (117.9, 133.3)**       |
| Unknown                                              | 54.9 (37.2, 74.7)**          |
| No                                                   | Reference                    |
| <b>Length of Gestation</b>                           |                              |
| 37 to 38 Weeks                                       | 261.6 (253, 270.5)**         |
| 41 to 42                                             | -15.4 (-18.8, -11.9)**       |
| 43 to 44                                             | 30.0 (21.0, 39.6)**          |
| 39 to 40                                             | Reference                    |
| <b>Month Prenatal Care Begin</b>                     |                              |
| 4th to 6th months of pregnancy                       | 18.0 (14.6, 21.6)**          |
| 7th month of pregnancy or later                      | 20.5 (14.4, 27.0)**          |

Supplemental Material, Table S4 (Continued).

| Category                           | Risk of Low Birth Weight (%) |
|------------------------------------|------------------------------|
| No care                            | 150.2 (129.1, 173.4)**       |
| Unknown                            | 36.8 (27.8, 46.4)**          |
| First 3 months of pregnancy        | Reference                    |
| <b>Birth Order</b>                 |                              |
| After first baby                   | -35.4 (-37.0, -33.8)**       |
| Unknown                            | -16.8 (-26.9, -5.3)**        |
| First Baby                         | Reference                    |
| <b>Delivery Method</b>             |                              |
| Vaginal                            | -20.8 (-23.1, -18.3)**       |
| Unknown                            | -18.8 (-22.6, -14.8)**       |
| C-Section                          | Reference                    |
| <b>Region</b>                      |                              |
| Delaware                           | -4.9 (-13.4, 4.4)            |
| Massachusetts                      | -6.3 (-14.2, 2.3)            |
| Maryland and DC                    | -5.3 (-12.5, 2.5)            |
| New Hampshire                      | -21.3 (-30.2, -11.2)**       |
| New Jersey                         | -6.7 (-13.7, 0.8)*           |
| Manhattan area, New York           | 10.4 (2.6, 18.7)**           |
| New York other than Manhattan area | -20.4 (-27.2, -12.9)**       |
| Eastern PA                         | -9.5 (-17.3, -1.0)**         |
| Western PA                         | -15.5 (-22.3, -8.1)**        |
| Rhode Island                       | -2.3 (-11.5, 7.9)            |
| Virginia                           | 10.4 (-0.4, 22.5)*           |
| Vermont                            | -11.8 (-25.9, 4.9)           |
| West Virginia                      | -6.0 (-18.8, 8.7)            |
| Connecticut                        | Reference                    |
| <b>Birth Year</b>                  |                              |
| 2000                               | 7.6 (-5.3, 22.4)             |
| 2001                               | 1.9 (-6.4, 10.9)             |
| 2002                               | -2.6 (-9.2, 4.4)             |
| 2003                               | -4.1 (-9.7, 1.9)             |
| 2004                               | -2.3 (-7.9, 3.7)             |
| 2005                               | -1.4 (-6.0, 3.3)             |
| 2006                               | -0.9 (-5.3, 3.8)             |
| 2007                               | Reference                    |
| <b>Birth Season</b>                |                              |
| Winter                             | 3.0 (-3.3, 9.7)              |
| Spring                             | 2.7 (-2.2, 7.9)              |
| Fall                               | -6.4 (-10.9, -1.6)**         |
| Summer                             | Reference                    |

Note: \* p-value 0.05-0.1, \*\* p-value <0.05.

Supplemental Material, Figure S1. Percentage change in relative risk of low birth weight per interquartile increment in selected pollutants for gestational exposure with single and two pollutant logistic models. This figure shows effects for pollutants that were not depicted in Figure 1. The point is the central estimate and the vertical line represents the 95% confidence interval. The black circle represents significant associations ( $p < 0.05$ ). The white diamond represents non-significant associations ( $p \geq 0.05$ ).

a) Results for CO, and NO<sub>2</sub>.

# Primary Pollutants

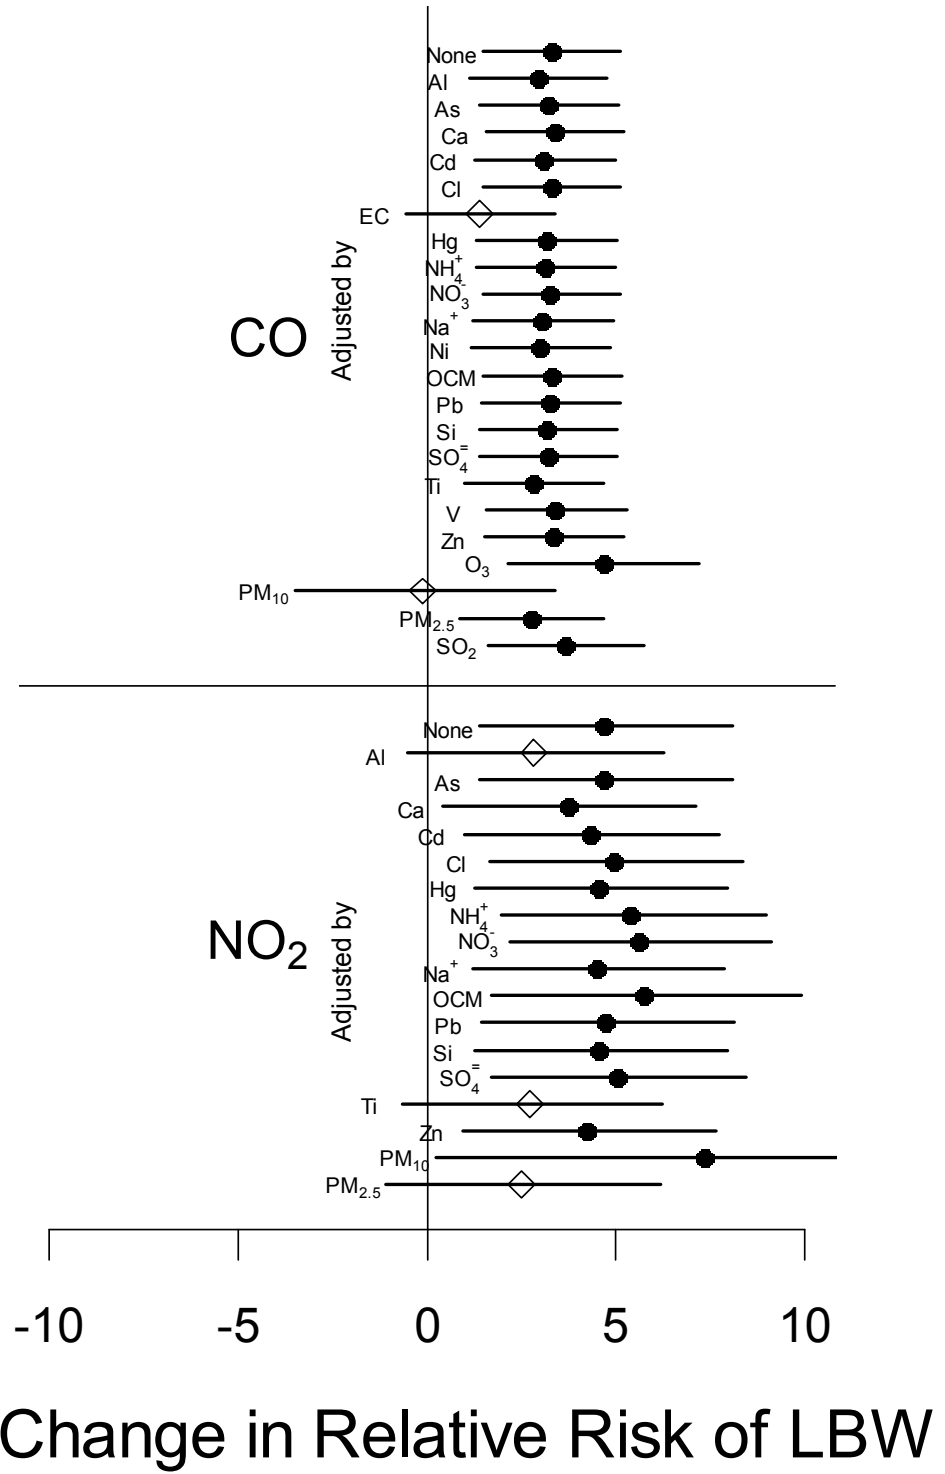

Supplemental Material, Figure S1 b) Results for O<sub>3</sub>, NO<sub>2</sub>, and PM<sub>10</sub>.

# Primary Pollutants

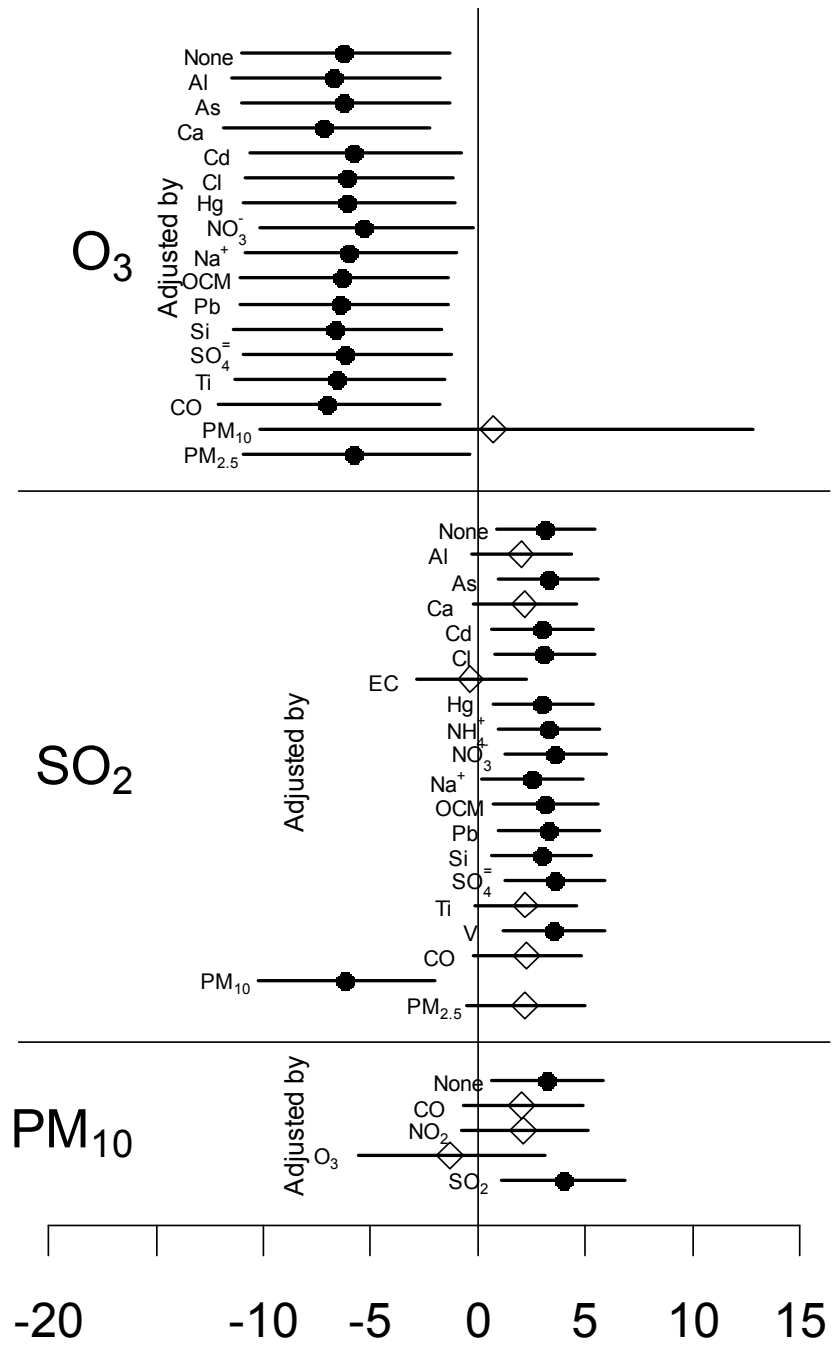

% Change in Relative Risk of LBW

Supplemental Material, Figure S1 c) Results for Calcium, Silicon, and Zinc.

Primary Pollutants

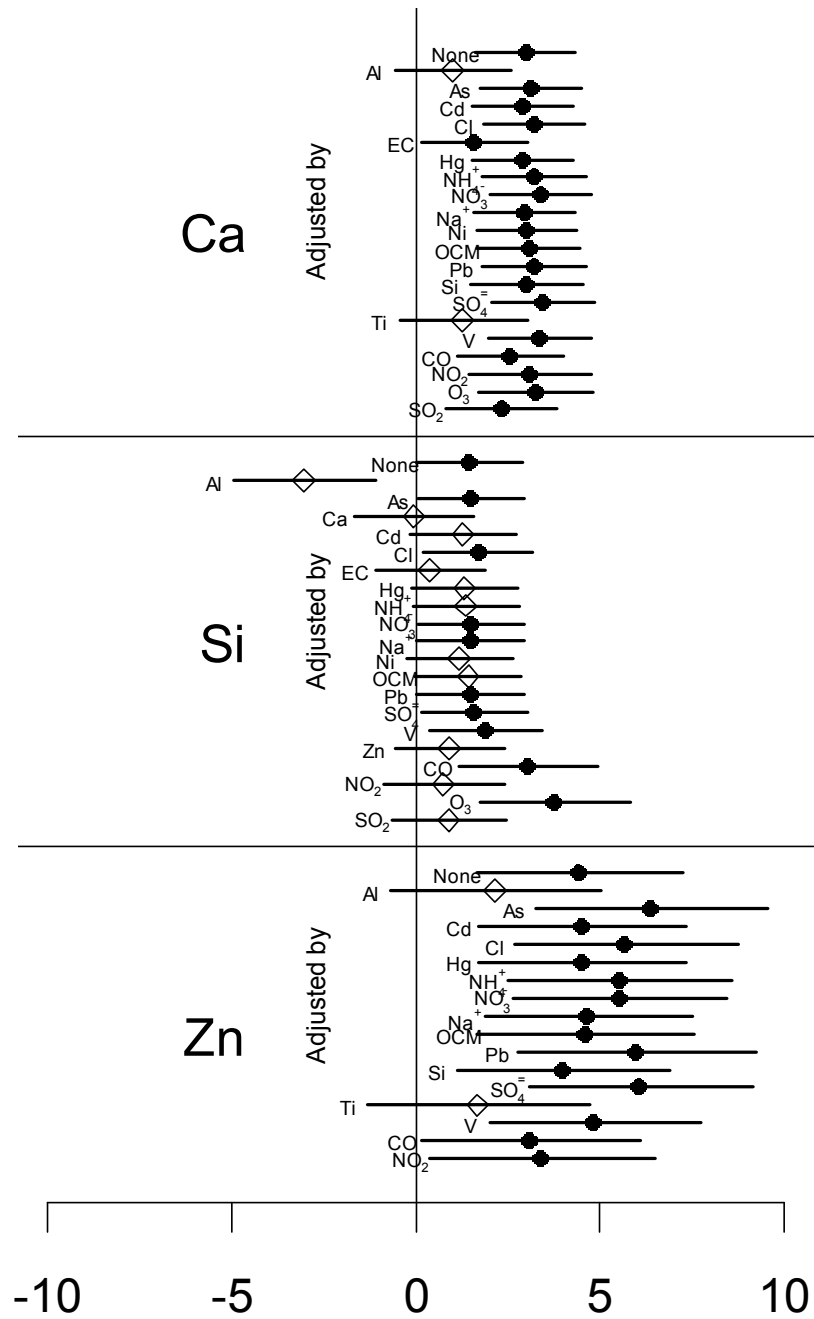

% Change in Relative Risk of LBW
